# Supplementary material
Source: PubMed Central journal article supplement (PMC2043033)

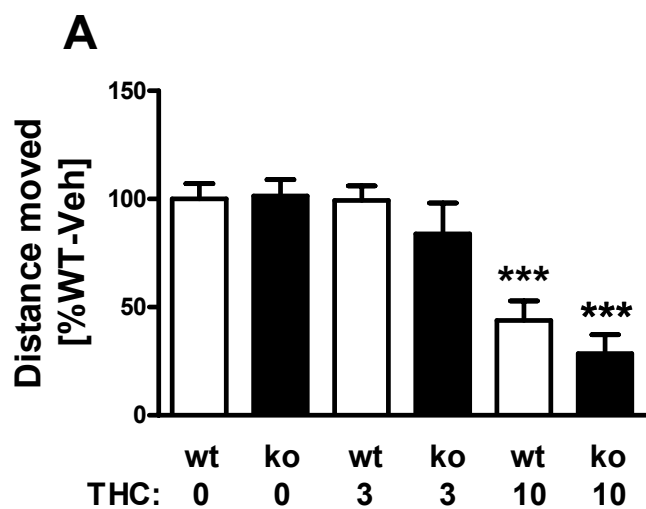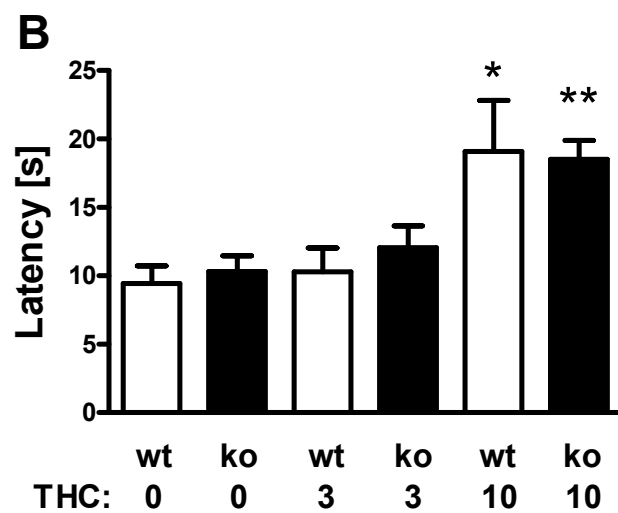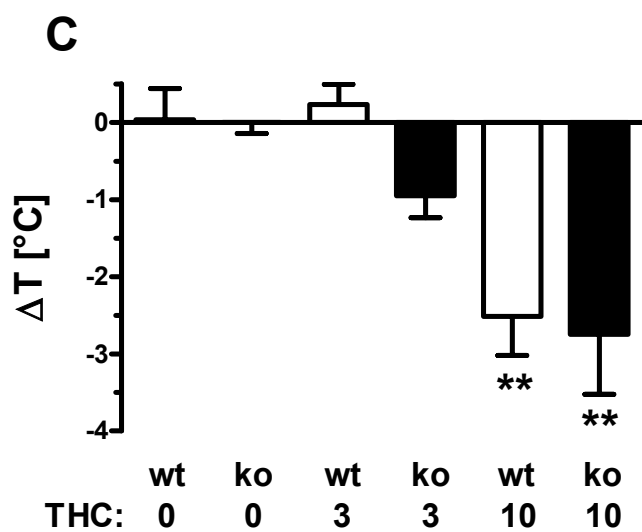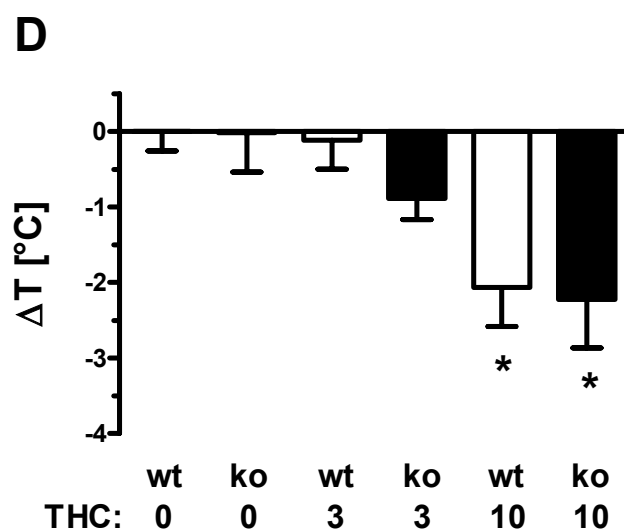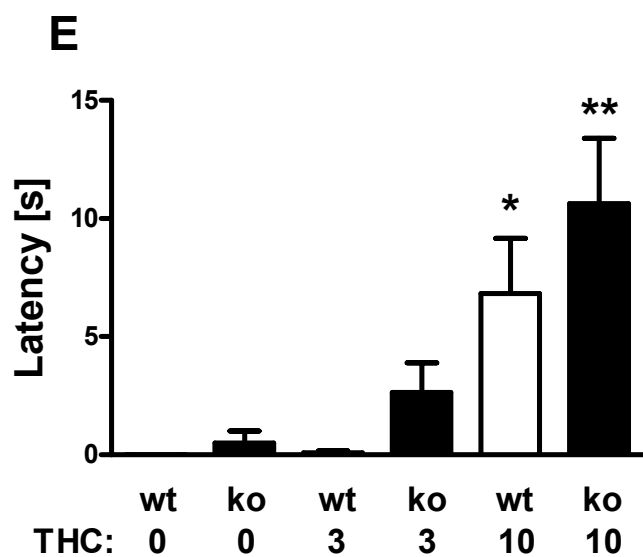

Supplement: pbio.0050269.sg001.pdf [file pbio.0050269.sg001.pdf]
